# Supplementary material for: Performance enhancement of thin-film amorphous silicon solar cells with low cost nanodent plasmonic substrates
Source: Royal Society of Chemistry journal article supplement (doi:10.1039/c3ee41139g), 2013-01-01
Supplement: c3ee41139g.pdf [file c3ee41139g.pdf]

# Performance Enhancement of Thin-Film Amorphous Silicon Solar Cells with Low Cost Nanodent Plasmonic Substrates

Hongtao Huang,<sup>a,b</sup> Linfeng Lu,<sup>b</sup> Jun Wang,<sup>b</sup> Jie Yang,<sup>b</sup> Siu-Fung Leung,<sup>c</sup> Yongqian Wang,<sup>d</sup> Di Chen,<sup>a</sup> Xiaoyuan Chen,<sup>b</sup> Guozhen Shen,<sup>\*a</sup> Dongdong Li<sup>\*b</sup> and Zhiyong Fan<sup>\*c</sup>

<sup>a</sup> Wuhan National Laboratory for Optoelectronics and College of Optoelectronic Science and Engineering, Huazhong University of Science and Technology, Wuhan, 430074, China. E-mail: [gzshen@hust.edu.cn](mailto:gzshen@hust.edu.cn)

<sup>b</sup> Shanghai Advanced Research Institute, Chinese Academy of Sciences, 99 Haik Road, Zhangjiang Hi-Tech Park, Pudong, Shanghai 201210, China. E-mail: [lidd@sari.ac.cn](mailto:lidd@sari.ac.cn)

<sup>c</sup> Department of Electronic and Computer Engineering, Hong Kong University of Science and Technology, Clear Water Bay, Kowloon, Hong Kong, China. E-mail: [ezfan@ust.hk](mailto:ezfan@ust.hk)

<sup>d</sup> Suntech Power Holdings Co., Ltd., 9 Xinhua Road, New District, Wuxi, Jiangsu Province 214028, China.

## Supplementary Information

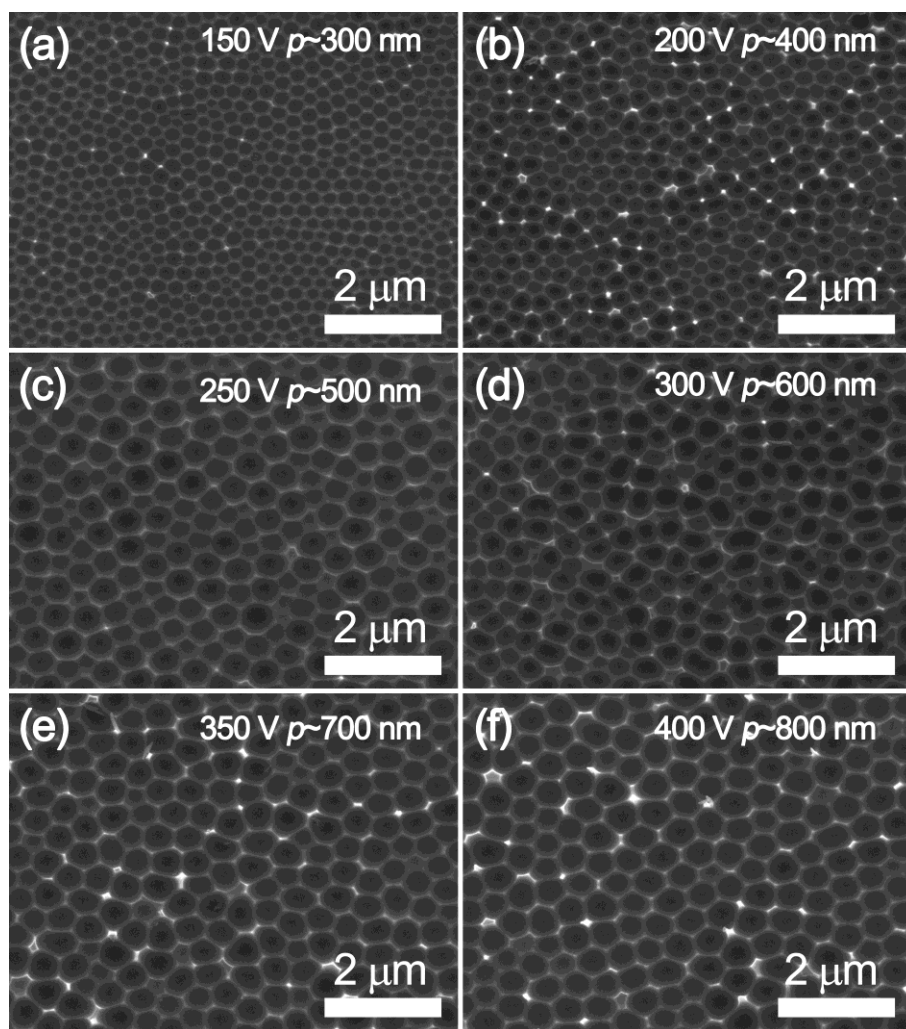

**Fig. S1** SEM images of patterned Al substrates anodized under (a) 150V, (b) 200 V, (c) 250 V, (d) 300 V, (e) 350 V and (f) 400 V.

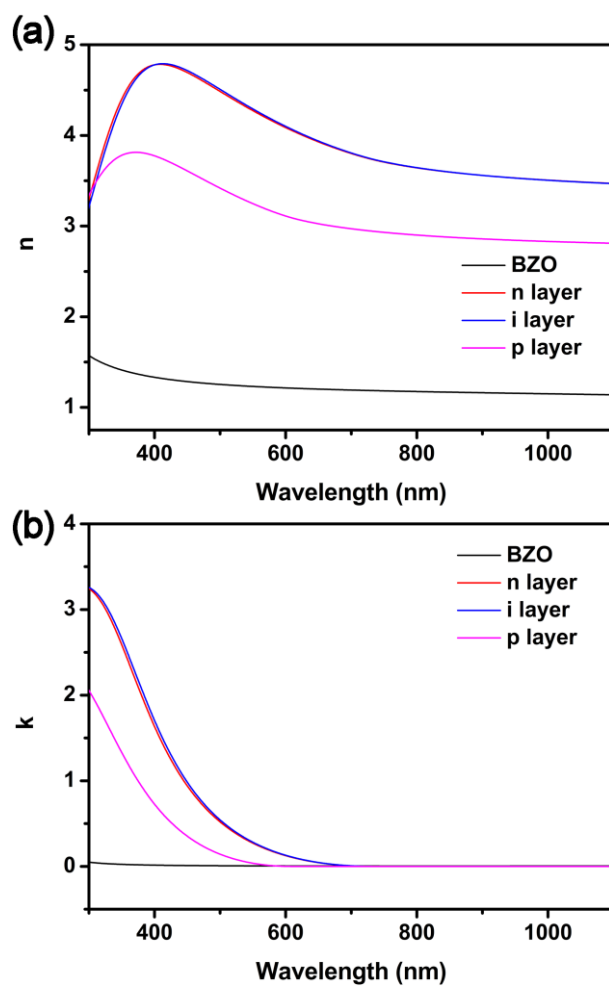

**Fig. S2** Measured refractive index (a) and extinction coefficient (b) of BZO and *n-i-p* a-Si:H

layers.

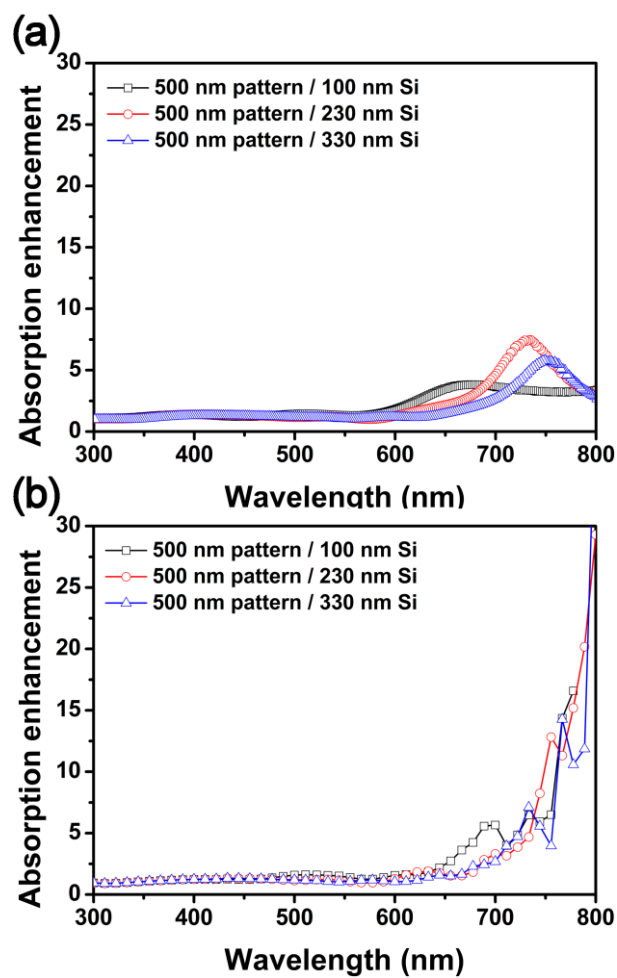

**Fig. S3** (a) Absorption enhancement of the whole devices calculated from the measured reflectance. (b) Absorption enhancement of the silicon layer calculated by simulation.

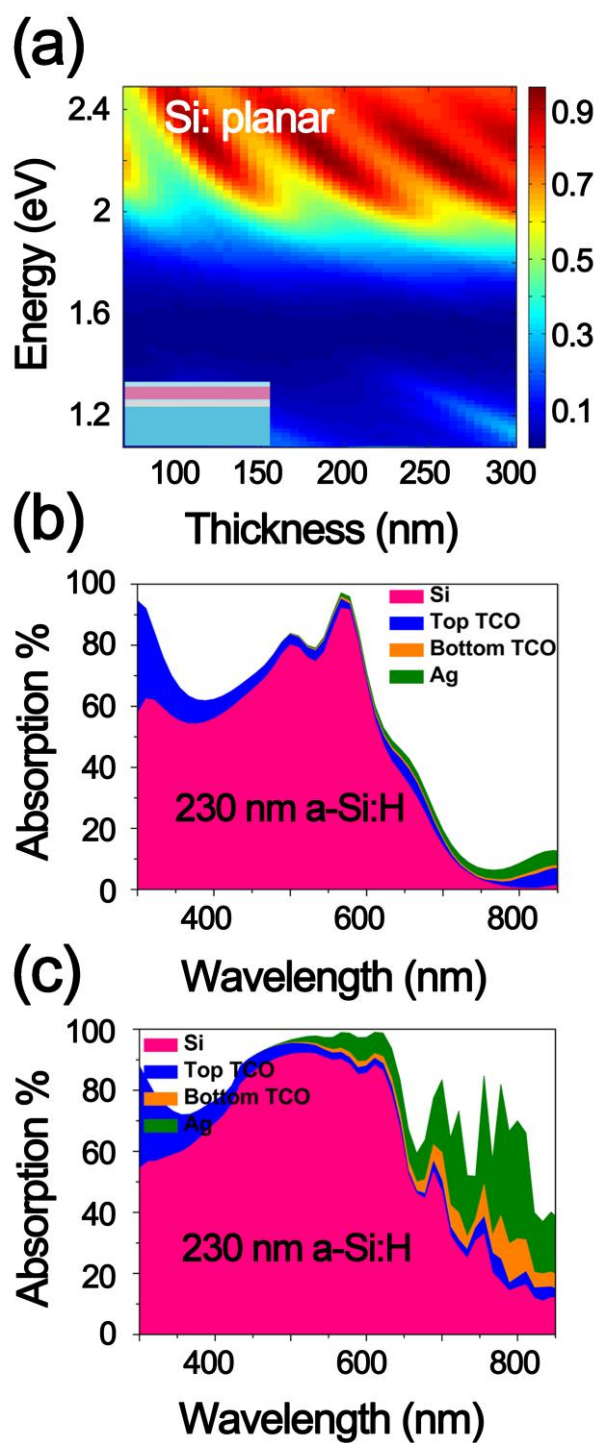

**Fig. S4** (a) Contour plot of calculated absorption of a-Si:H on polished substrate. (b, c) Calculated absorption of each layer in planar (b) and patterned (c) devices with 230 nm silicon layers.

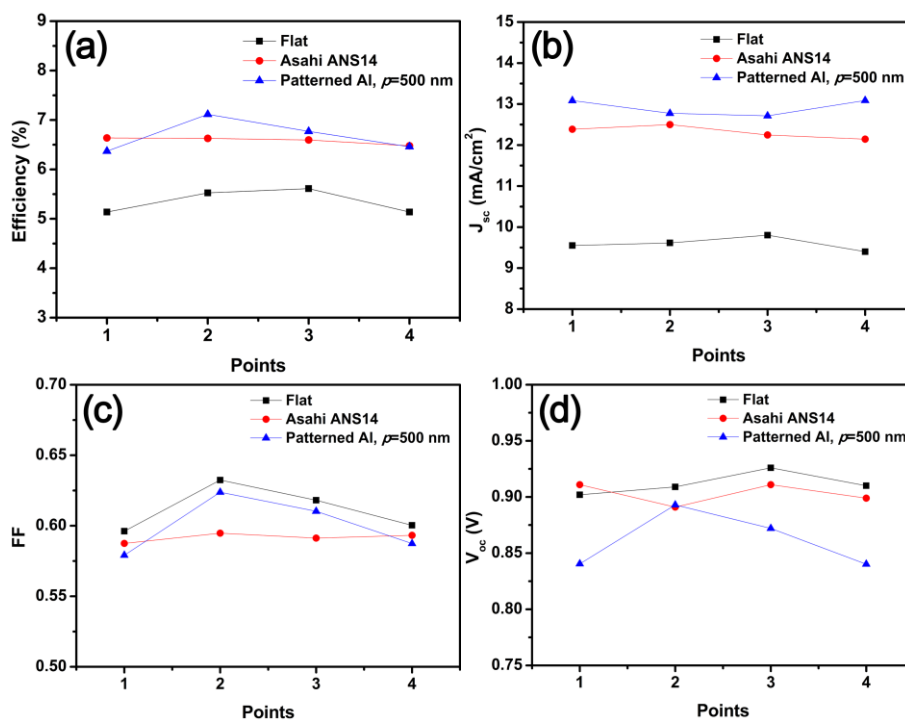

**Fig. S5** Statistics of the performance parameters of solar cells on planar substrate, Asahi ANS14

glass and patterned Al: (a) efficiencies; (b) short circuit current densities; (c) fill factors; (d) open circuit voltages

**Table S1** Statistics of electrical performance

|                             | Flat    |         |        | Asahi ANS14 |         |         | Patterned Al |         |         |
|-----------------------------|---------|---------|--------|-------------|---------|---------|--------------|---------|---------|
|                             | Maximum | Minimum | Mean   | Maximum     | Minimum | Mean    | Maximum      | Minimum | Mean    |
| $\eta$ %                    | 5.6112  | 5.1362  | 5.3520 | 6.6355      | 6.4783  | 6.5842  | 7.1149       | 6.3745  | 6.6756  |
| $J_{sc}$ mA/cm <sup>2</sup> | 9.8016  | 9.4001  | 9.5914 | 12.4991     | 12.1442 | 12.3190 | 13.1162      | 12.7127 | 12.9278 |
| FF                          | 0.5961  | 0.6324  | 0.6117 | 0.5947      | 0.5875  | 0.5916  | 0.6238       | 0.5809  | 0.6006  |
| $V_{oc}$ V                  | 0.9261  | 0.9020  | 0.9117 | 0.9118      | 0.8916  | 0.9033  | 0.8928       | 0.8406  | 0.8617  |
